# Supplementary figures and images for: HIV RGB: Automated Single-Cell Analysis of HIV-1 Rev-Dependent RNA Nuclear Export and Translation Using Image Processing in KNIME
Source: MDPI journal article supplement (doi:10.3390/v14050903), 2022-04-26

# Rev-mCherry Trafficking

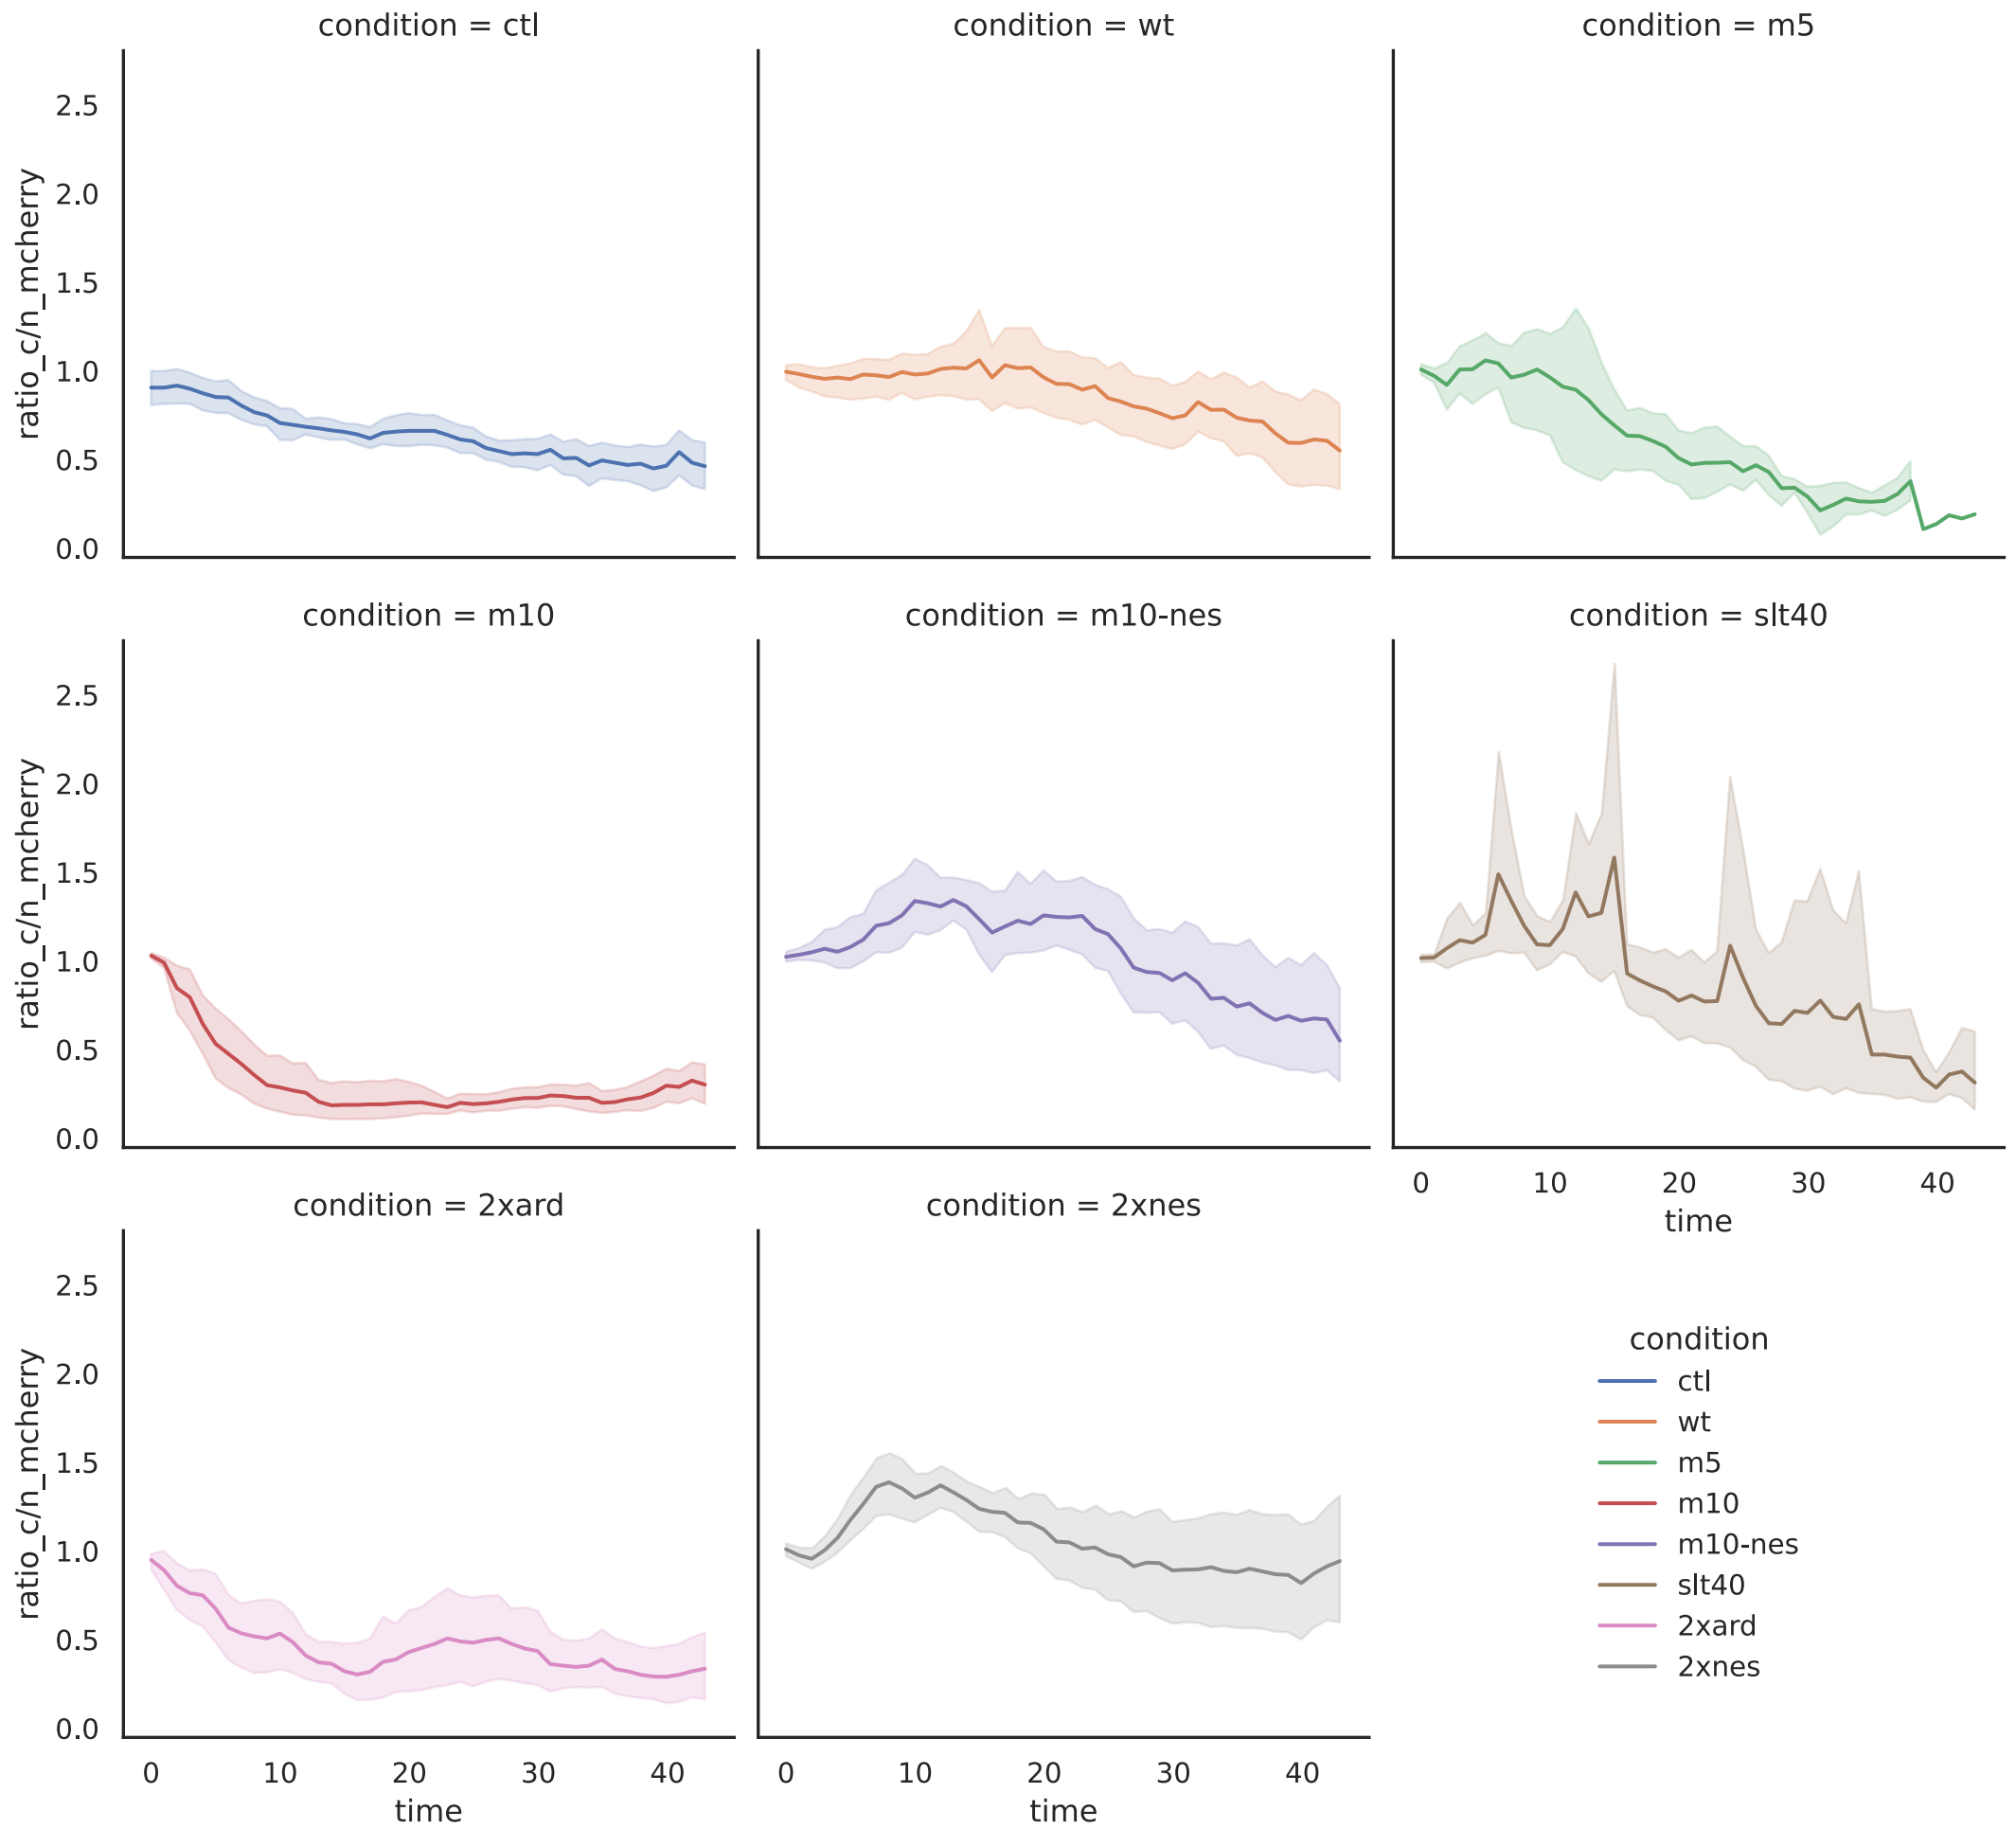

US vRNA (MS2-YFP)

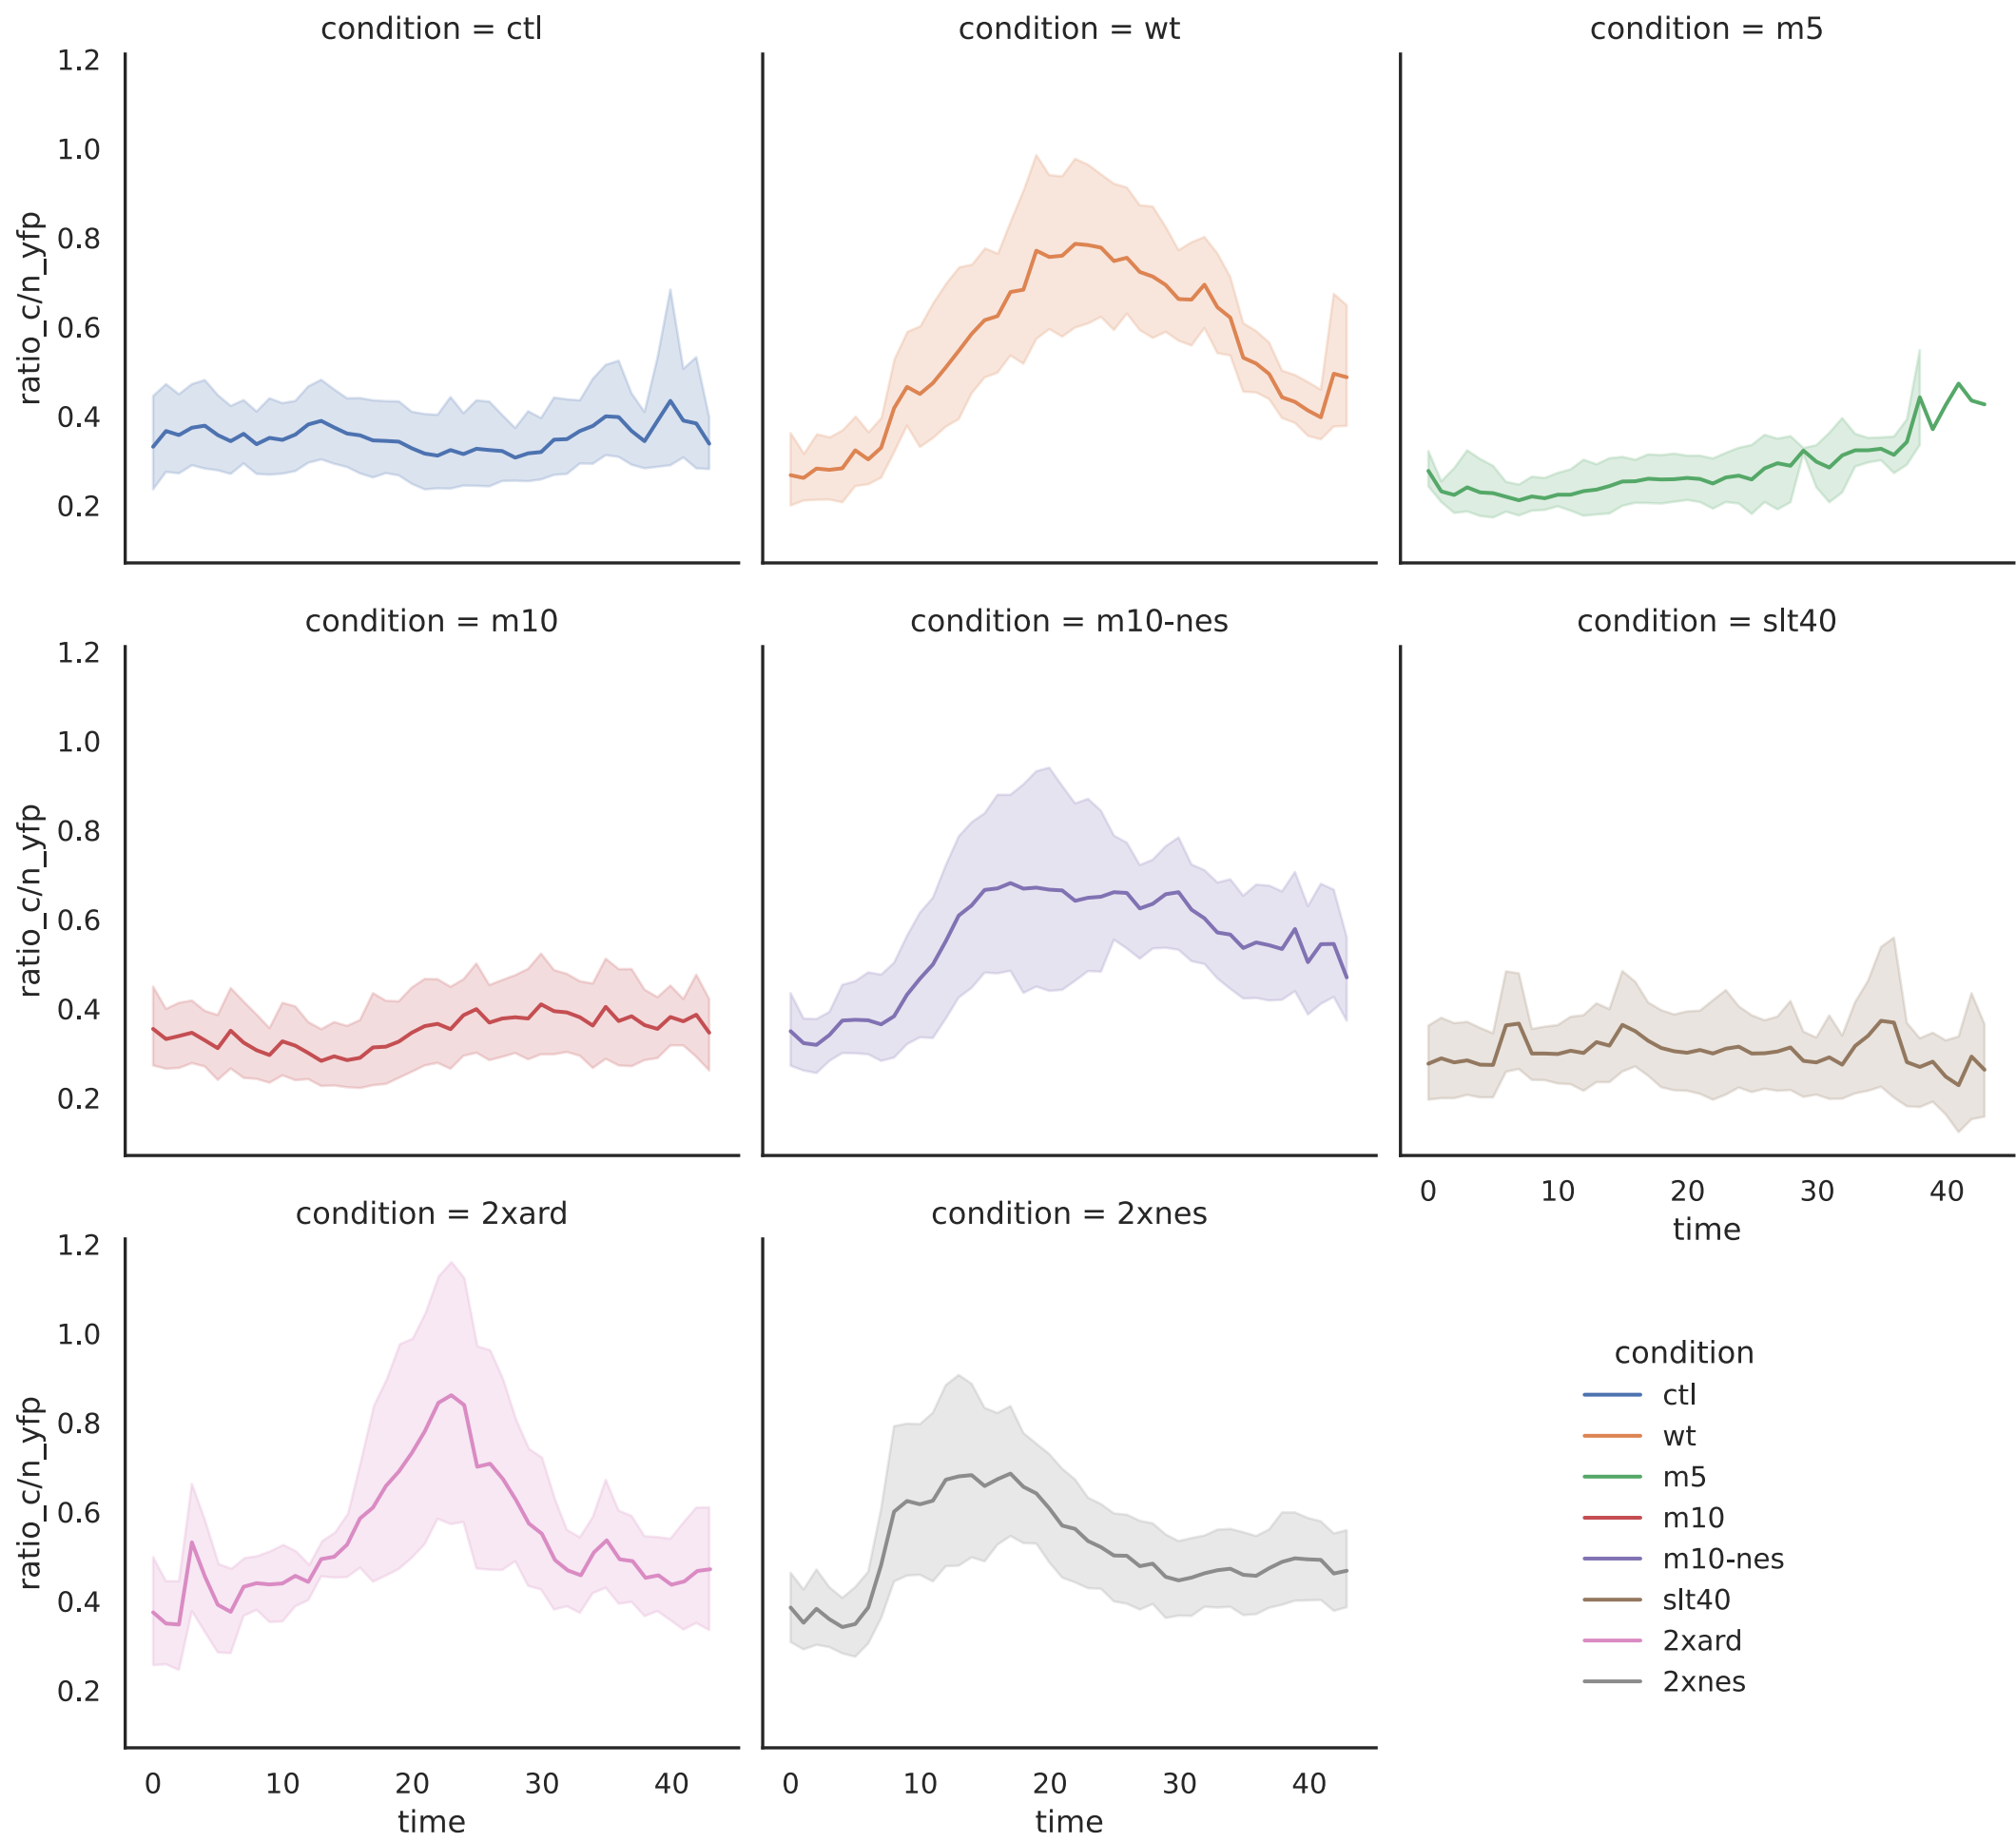

# US-vRNA Translation (Gag-CFP)

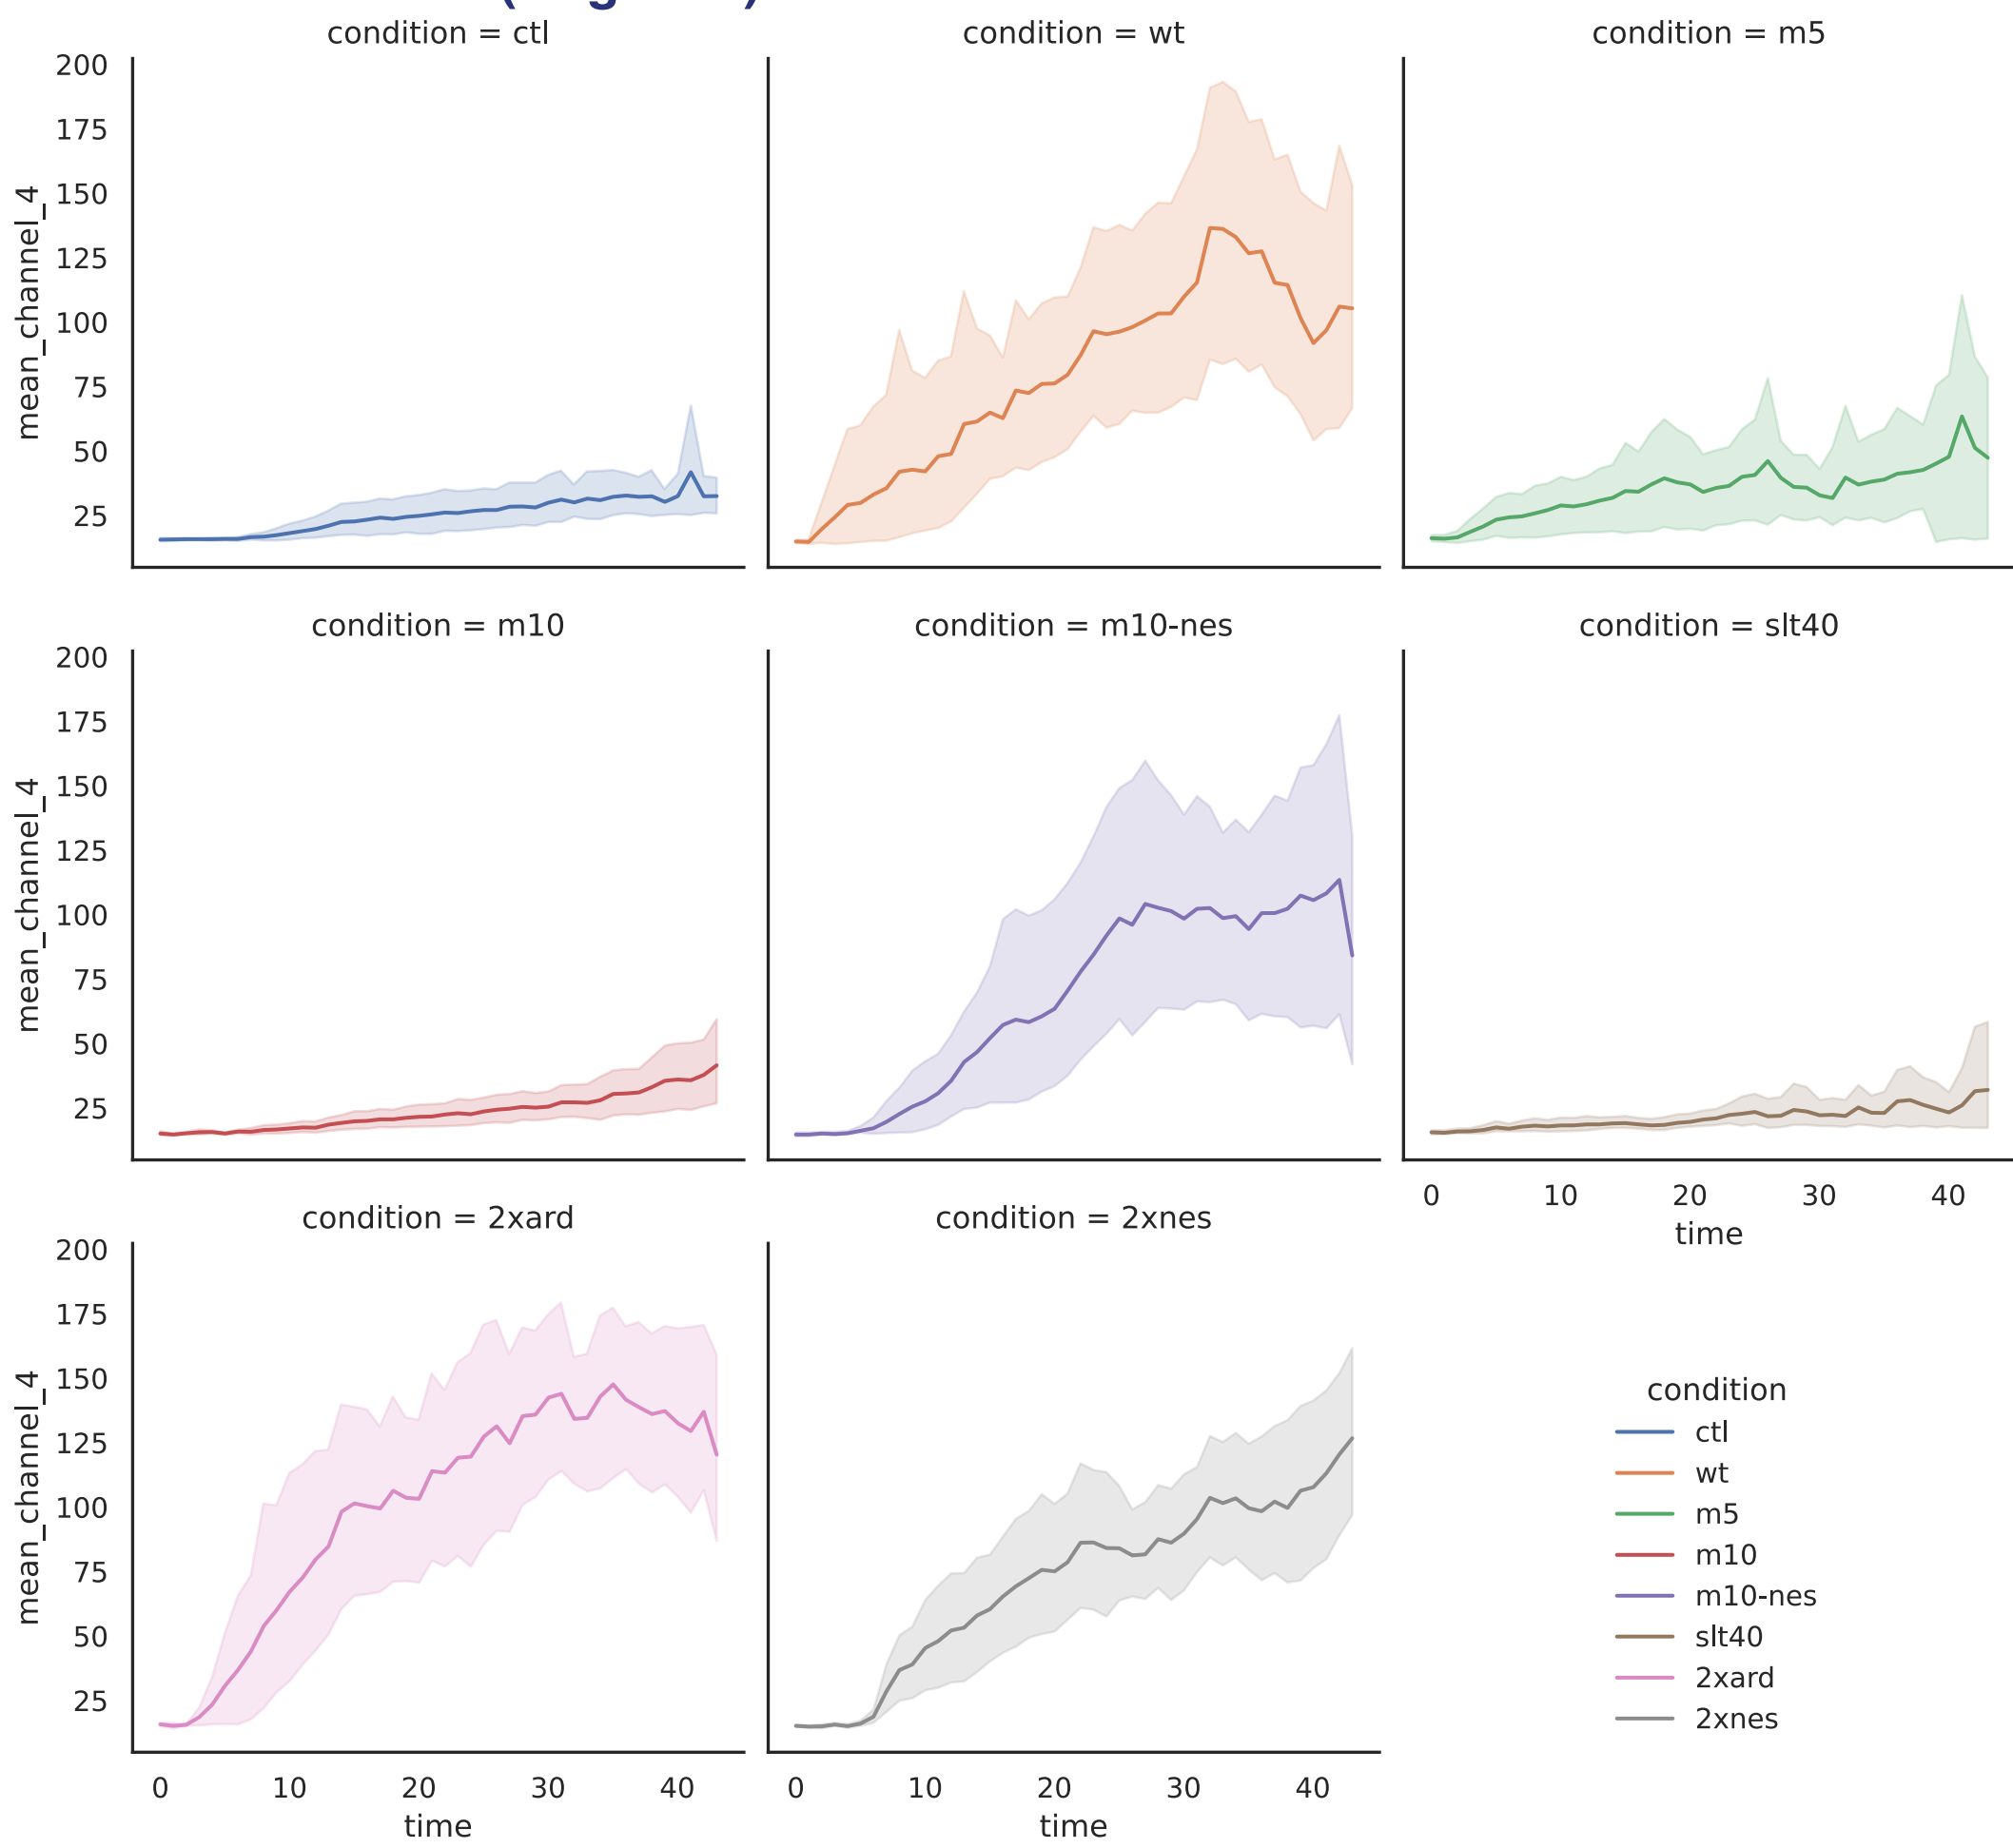

Supplement: s1 [file s1]
